# Supplementary material for: Metallothionein Expression as Physiological Response Against Metal Toxicity in the Striped Rockcod <em>Trematomus hansoni</em>
Source: Preprints.org preprint supplement (doi:10.20944/preprints202209.0064.v1), 2022-09-05
Supplement: Supplementary file 1 [file Table S1.docx]

| PRIMER | Sequences 5’🡪3’ | Amplicon (bp) | Ta (°C) |
| --- | --- | --- | --- |
| MT-1_fw | 5’-GGACCTGCAACTGCGGAG-3’ | 123 | 60 |
| MT-1_rv | 5’-CTTTGCACACACAGCCAGAG-3’ | 60 |
| MT-2_fw | 5’-ACAACACGCTCTCATCTGA-3’ | 110 | 60 |
| MT-2_rv | 5’-AGTTGCAGGTCCCACTTTTG-3’ | 60 |
| GAPDH_b_fw | 5’-ATCACAGCCACACAGAAGAC-3’ | 126 | 60 |
| GAPDH_b_rv | 5’-AGGAATGACTTTGCCCACAG-3’ | 60 |

*Table S1. Primer pairs used for qRT-PCR. Amplicon sizes and annealing temperatures (Ta) are also indicated.*
